# Supplementary material for: Directing the migration of serum-free, ex vivo-expanded Vγ9Vδ2 T cells
Source: PubMed Central journal article supplement (PMC10937339; doi:10.3389/fimmu.2024.1331322), 2024-02-29

# Supplementary Figure 1: $\gamma\delta$ T cell phenotype remains unchanged from peripheral blood to bone marrow.

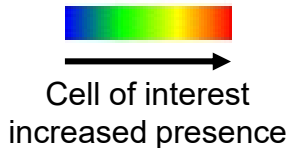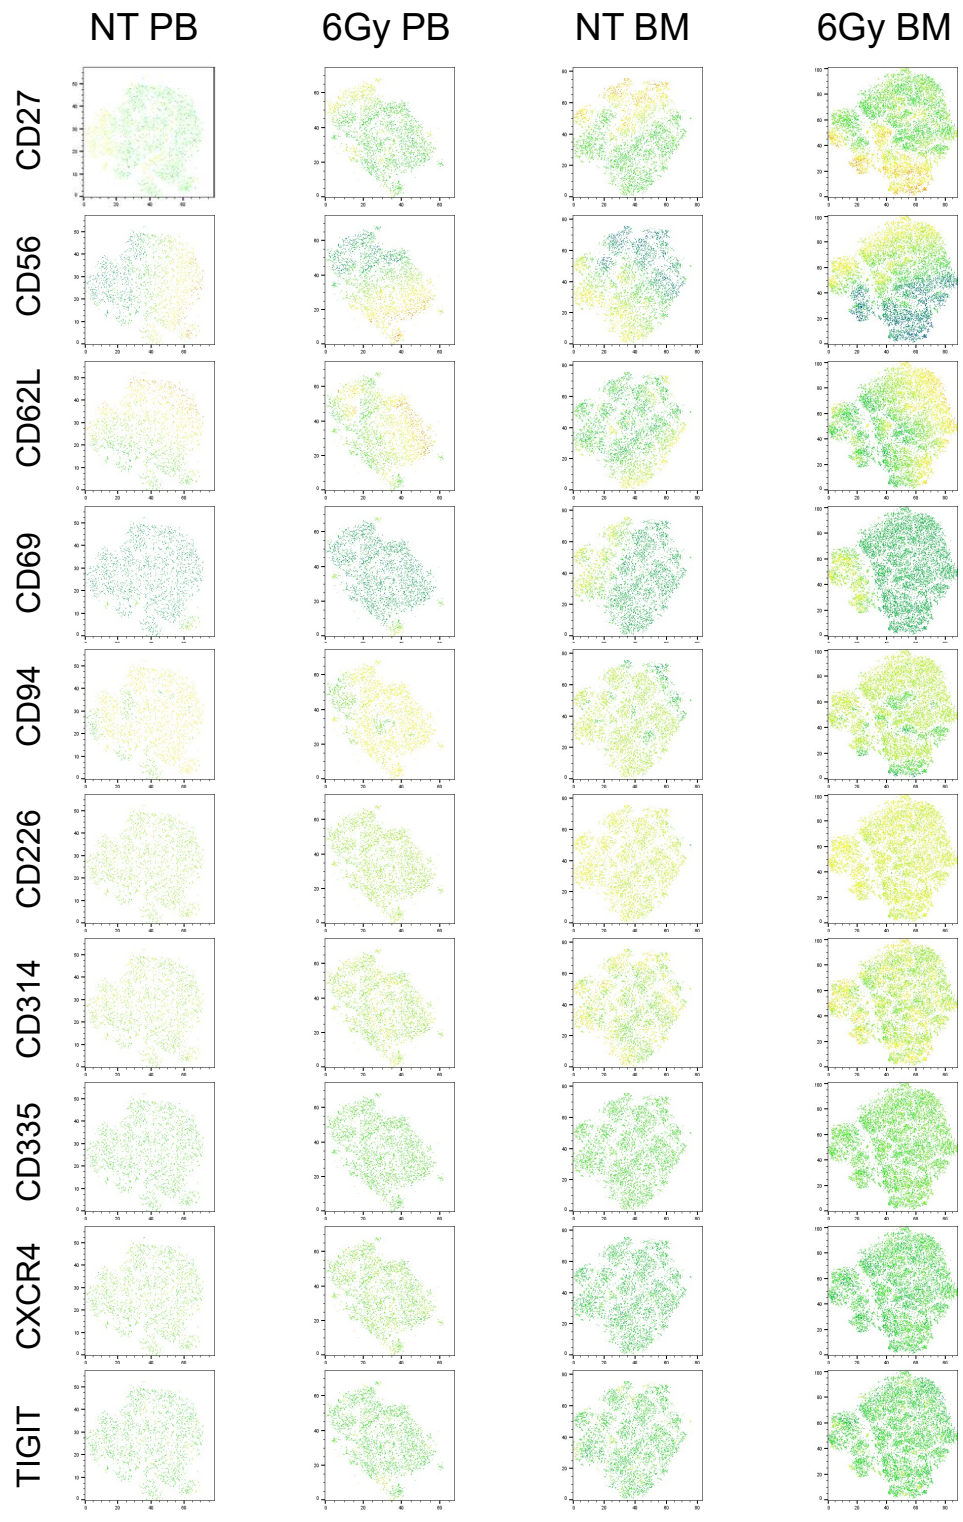

**Supplementary Figure 2: Human  $\gamma\delta$  T cells do not migrate to mouse bone marrow despite the presence of human hematopoietic-derived cell lines.**

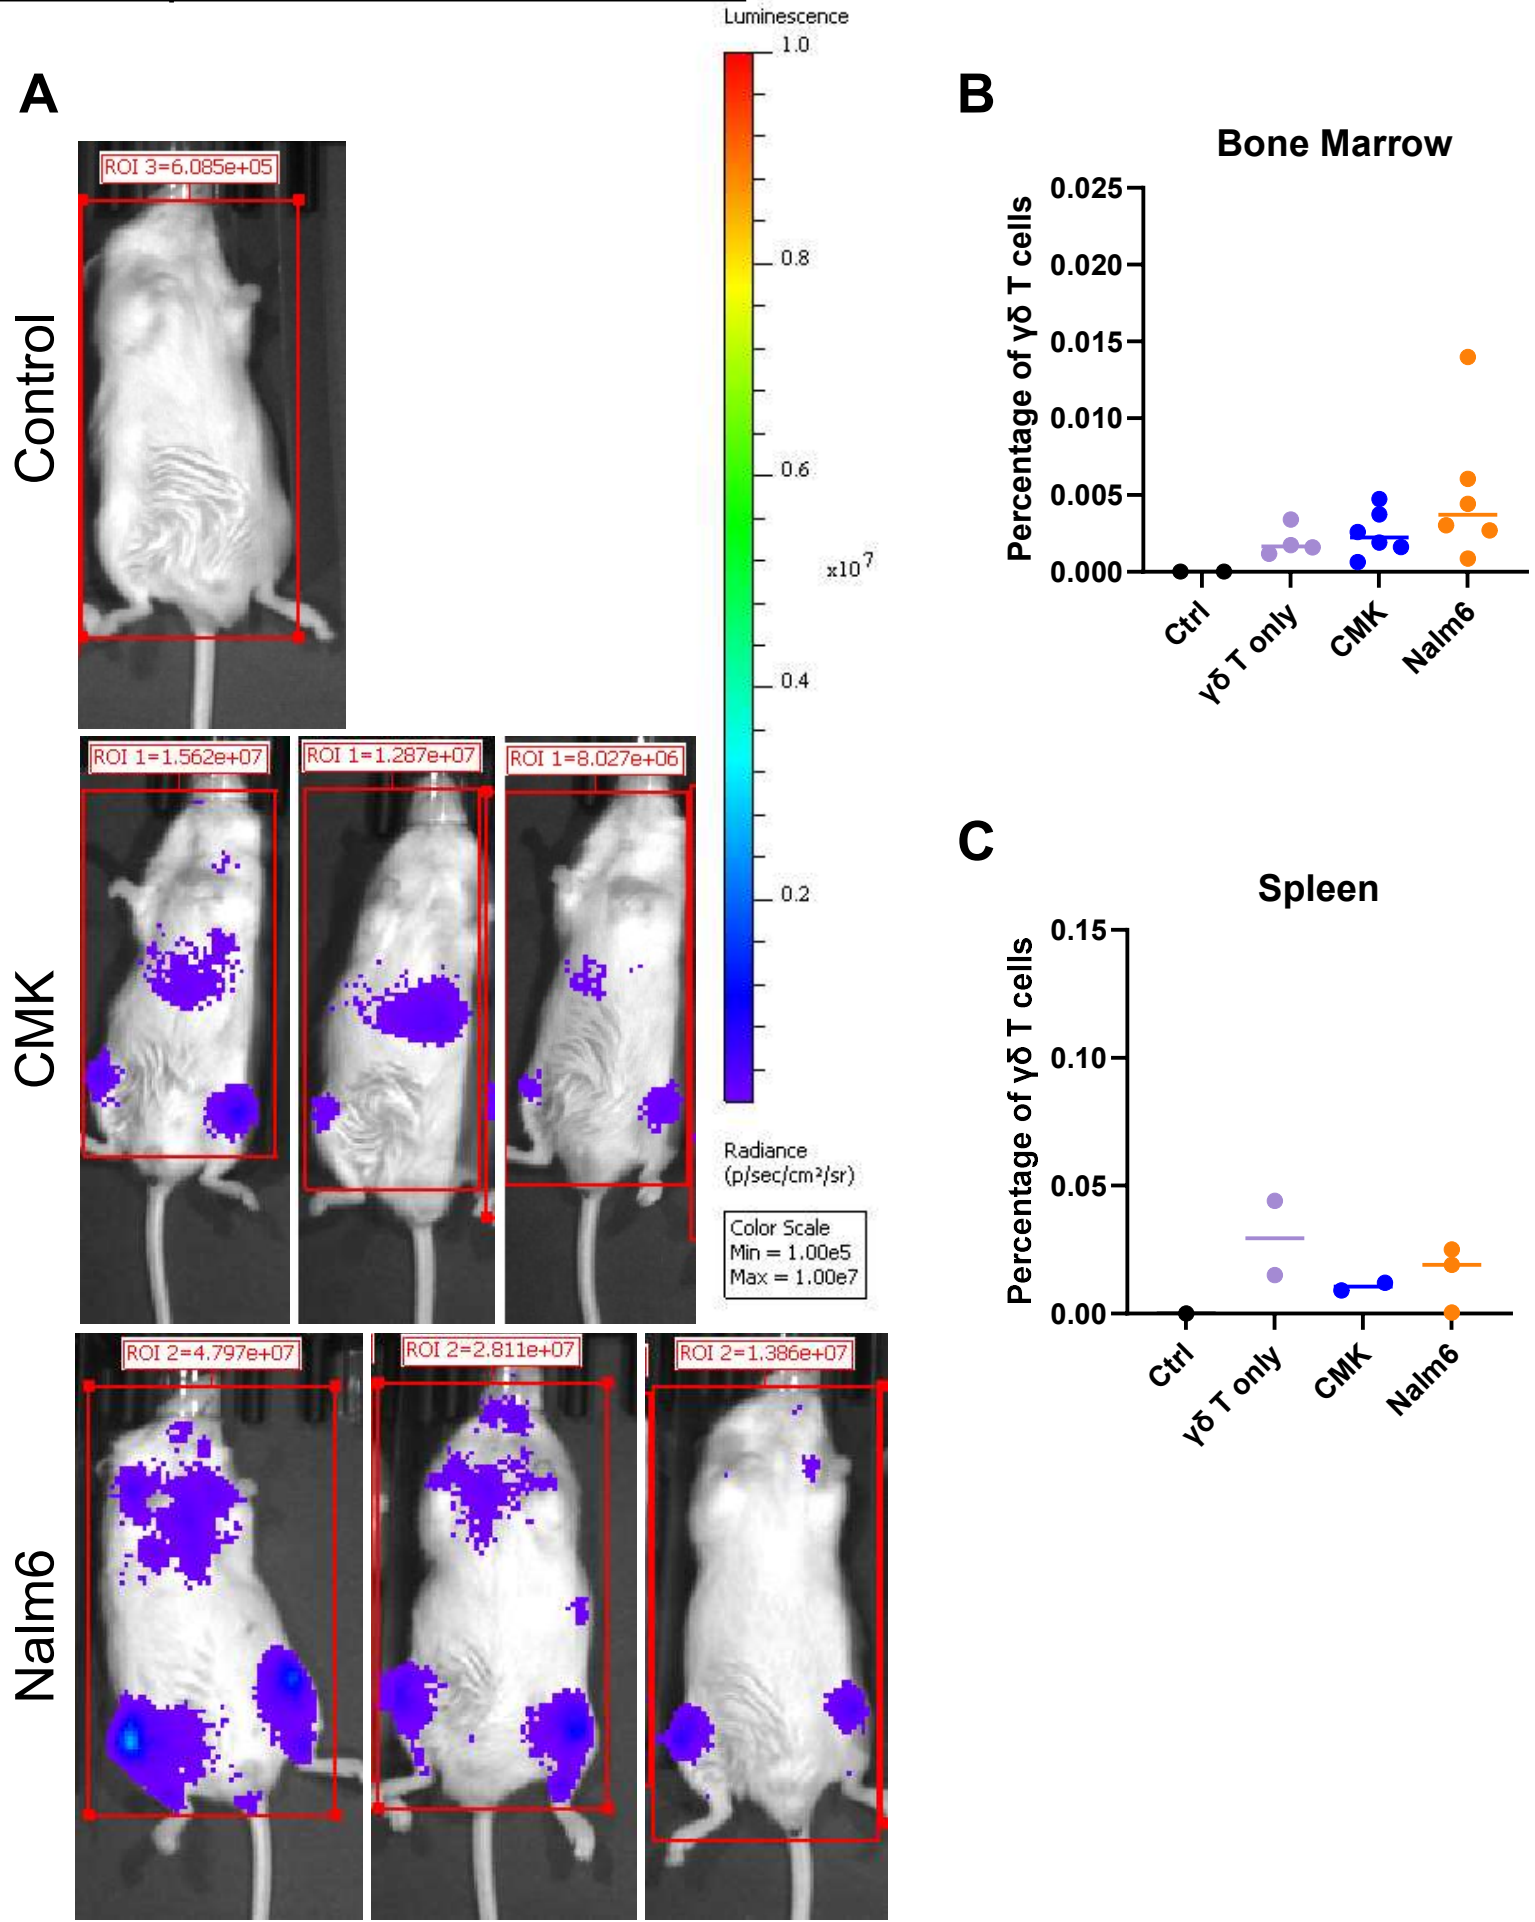

**Supplementary Figure 3: Busulfan does not allow  $\gamma\delta$  T cells to migrate into the bone marrow.**

**A**

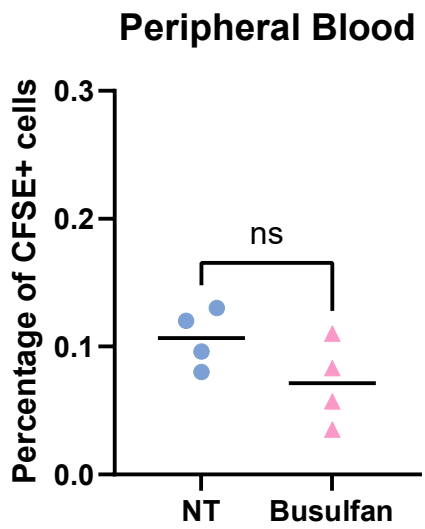

**B**

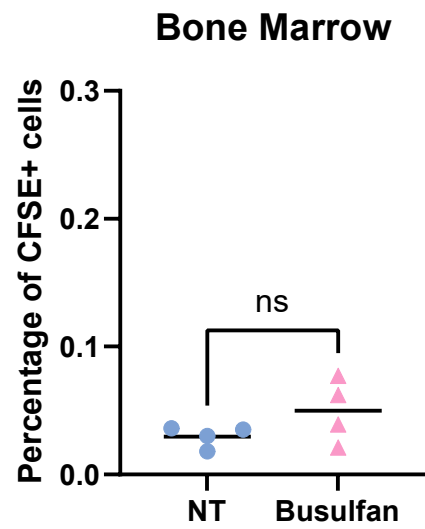

# Supplementary Figure 4: $\gamma\delta$ T cells do not express CXCR4 despite differences in expansion methods.

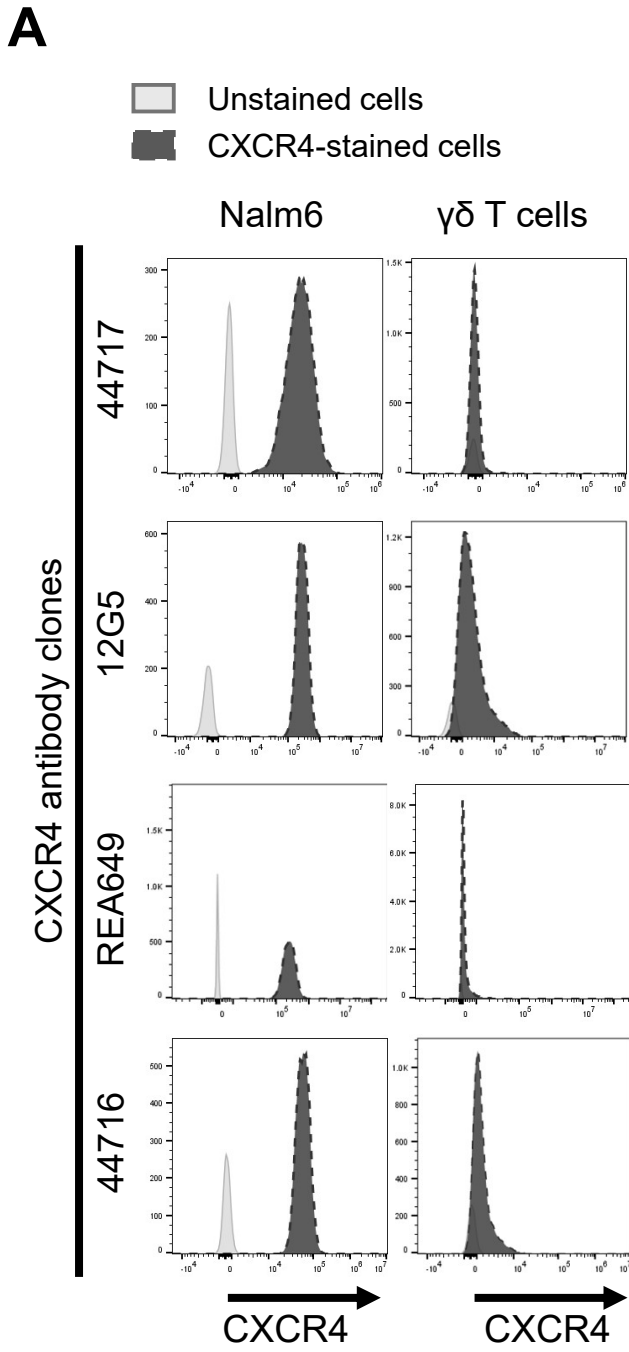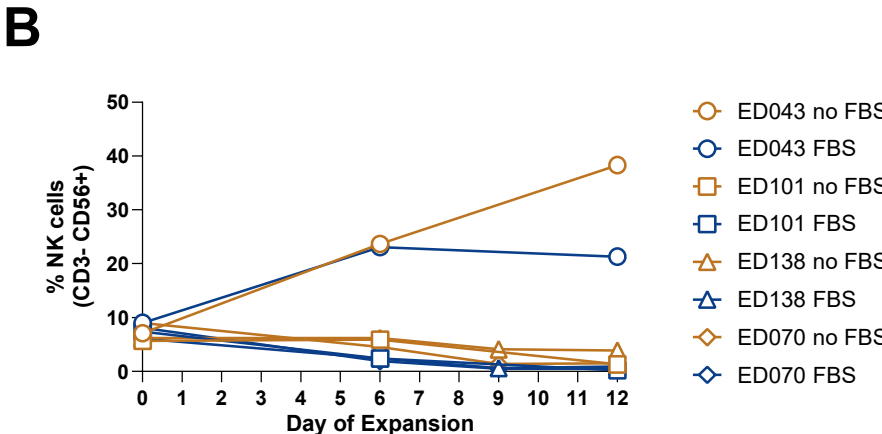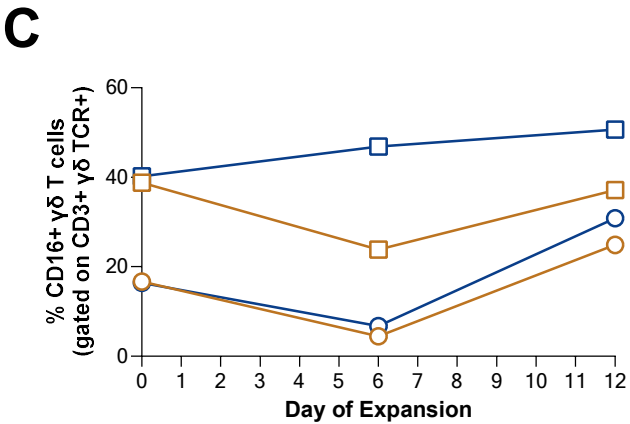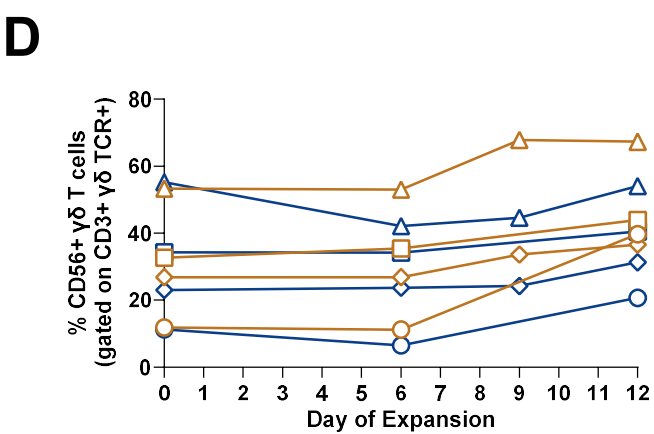

**Supplementary Figure 5:  $\gamma\delta$  T cells express CCR2, and  $\gamma$ MSCs secrete CCL2.**

**A**

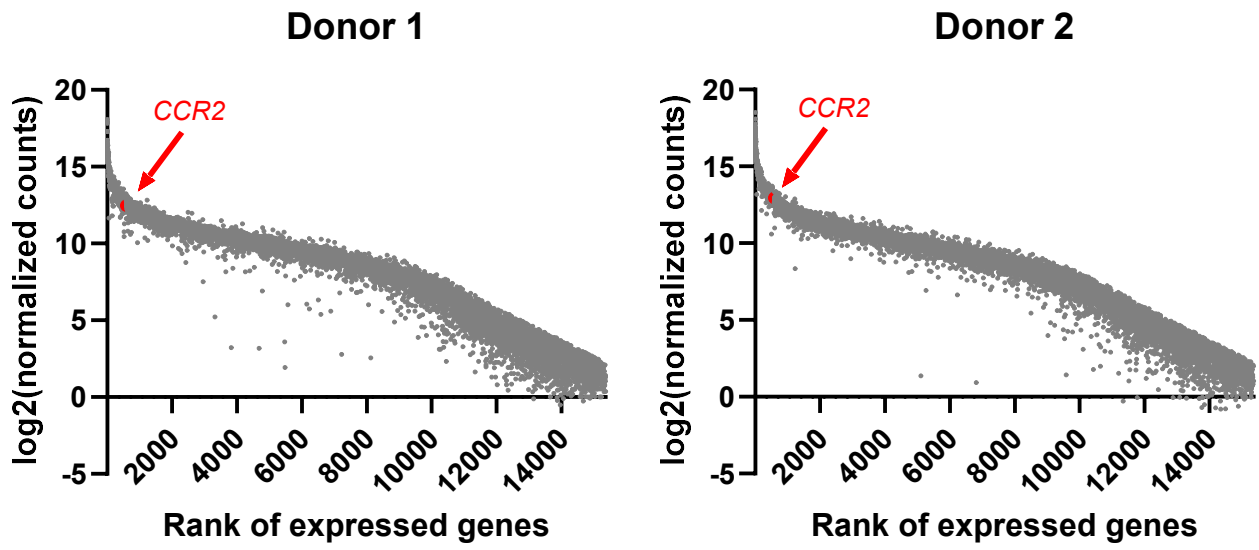

**B**

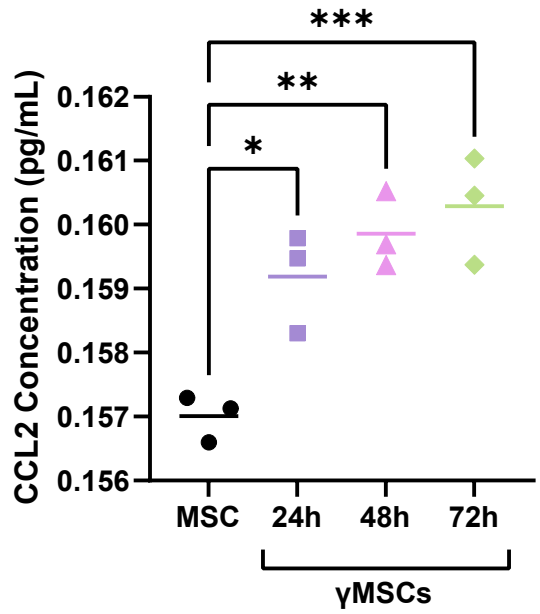

**C**

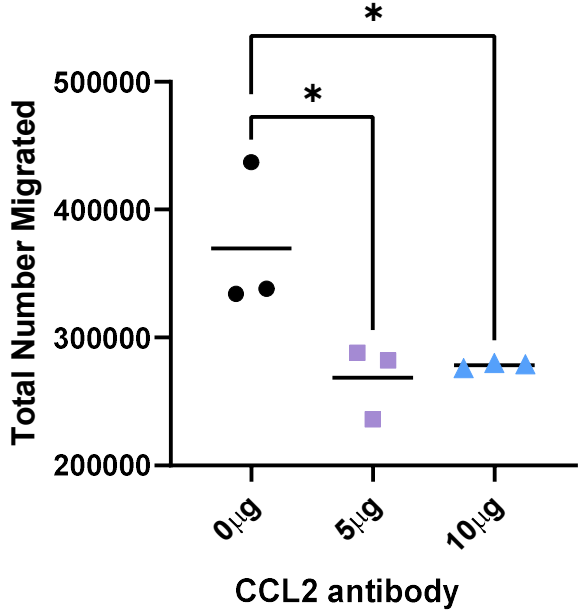

Supplement: Image_1.pdf [file Image_1.pdf]
